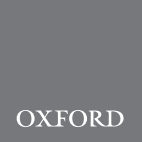

---

## Erratum

# **Adaptive boosting-based computational model for predicting potential miRNA-disease associations**

**Yan Zhao, Xing Chen and Jun Yin**

---

*Bioinformatics* (2019) doi: 10.1093/bioinformatics/btz297

In the above mentioned article, several mathematical variables were inadvertently duplicated. These duplicates have now been removed.

The publisher apologises for this error.
